# Supplementary material
Source: publisher site journal article supplement (http://www.degruyter.com/publication/journal_key/BIOMAT/downloadAsset/BIOMAT_BNM%20Flyer.pdf)
Supplement: Supplementary file 1 [file BIOMAT_BNM%20Flyer.pdf]

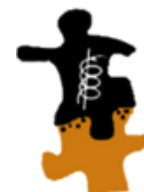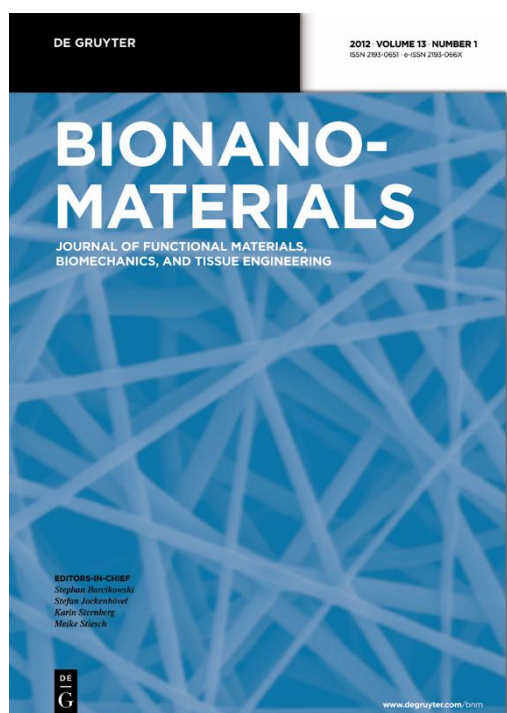

#### 4 ISSUES PER YEAR

ISSN 2193-0651

eISSN 2193-066X

#### EDITORS-IN-CHIEF

Stephan Barcikowski, *Essen, Germany*

Stefan Jockenhövel, *Aachen, Germany*

Katrin Sternberg, *Tuttlingen, Germany*

Meike Stiesch, *Hannover, Germany*

#### EDITORIAL BOARD

Aldo R. Boccaccini, *Erlangen-Nürnberg, Germany*

Klaus Liefeth, *Heilbad Heiligenstadt, Germany*

Klaus Müllen, *München, Germany*

Minna Kellomäki, *Tampere, Finland*

Fergal O'Brien, *Dublin, Ireland*

Werner Weitschies, *Greifswald, Germany*

Koudy Williams, *Winston-Salem, NC, USA*

## OBJECTIVE:

BioNanoMaterials (BioNanoMat) is a multidisciplinary journal that provides reports on fundamentals and clinical application of biomaterials, in particular nanobiomaterials. The journal keeps you up-to-date with all new developments in the field.

## TOPICS:

- ▶ Biomaterials and surface modification/functionalization
- ▶ Scaffold material in tissue engineering
- ▶ Chemistry (nanoparticles and nanomaterials)
- ▶ Dental implantology/prosthodontics

## BENEFITS:

- ▶ Rapid publications on application of biomaterials
- ▶ Recent research results of exceptional significance
- ▶ Ahead-of-print publications
- ▶ Dental implantology/prosthodontics

BioNanoMaterials is the official Journal of the **German Society for Biomaterials (Deutsche Gesellschaft für Biomaterialien)** and publishes the abstracts of the annual society conferences.

## Submit your paper

### Your benefits of publishing in BioNanoMaterials:

- ▶ Rapid online publication ahead-of-print with short turnaround times for submission to first decision and about 3 weeks from acceptance to publication
- ▶ High quality double blind peer-review
- ▶ Free publication of color figures both in online and print editions and no page charges
- ▶ Every article easily discoverable because of SEO and comprehensive [abstracting and indexing services](#)
- ▶ Convenient citation tracking via [e-mail alert](#)
- ▶ Secure archiving by De Gruyter and the independent archiving service [Portico](#)

Please submit your paper here:

→ <http://mc.manuscriptcentral.com/bnm>
